# Supplementary material for: Understanding Participation of Liver Transplant Recipients in an Exercise Intervention RCT: A Cross-sectional Study of Barriers and Motivators
Source: Research Square preprint supplement (doi:10.21203/rs.3.rs-7184379/v1), 2025-08-06
Supplement: Supplementary file 1 [file e35ca03f73aebbb16762ae2a.docx]

# **SUPPLEMENTARY FIGURES AND TABLES**

## **Supplementary Appendix I: Socio-demographic and medical questionnaire**


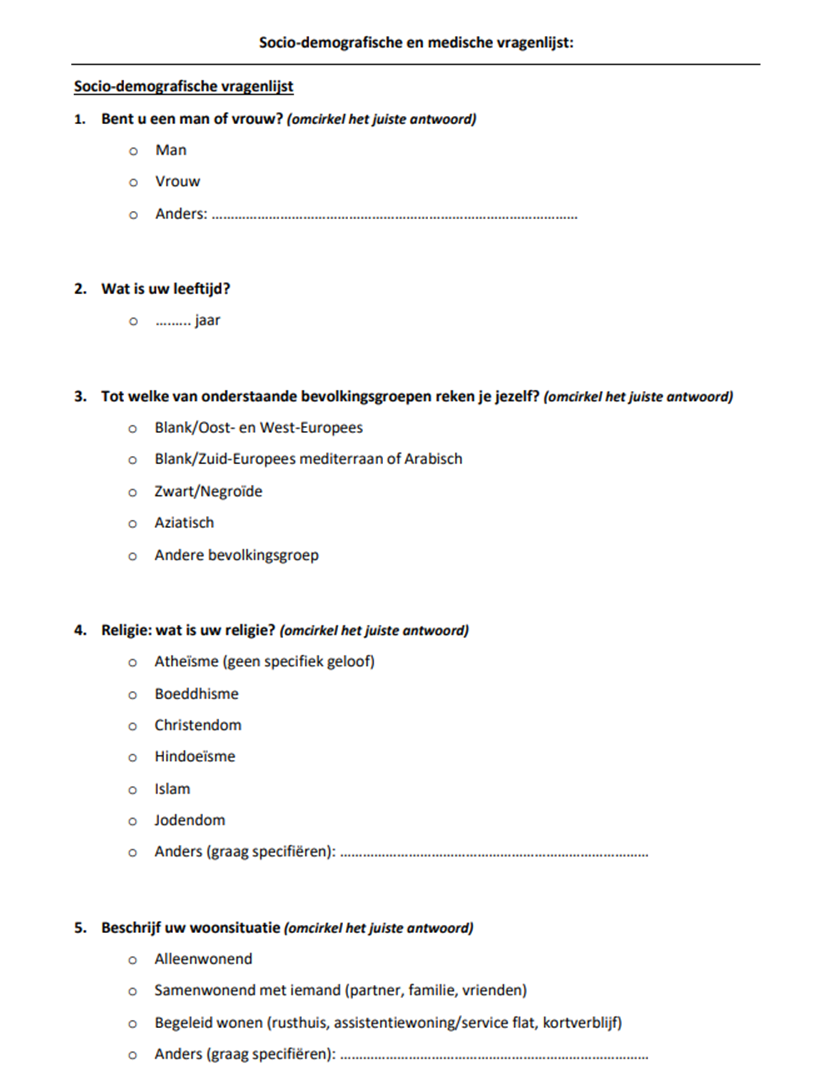


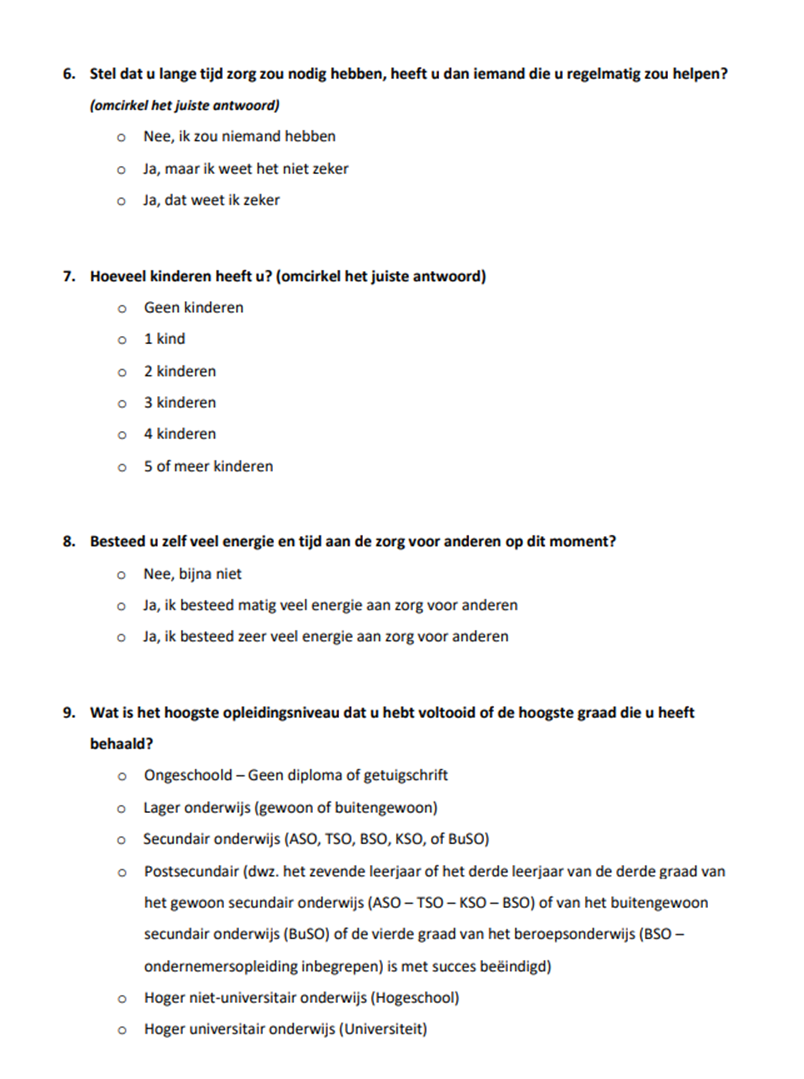

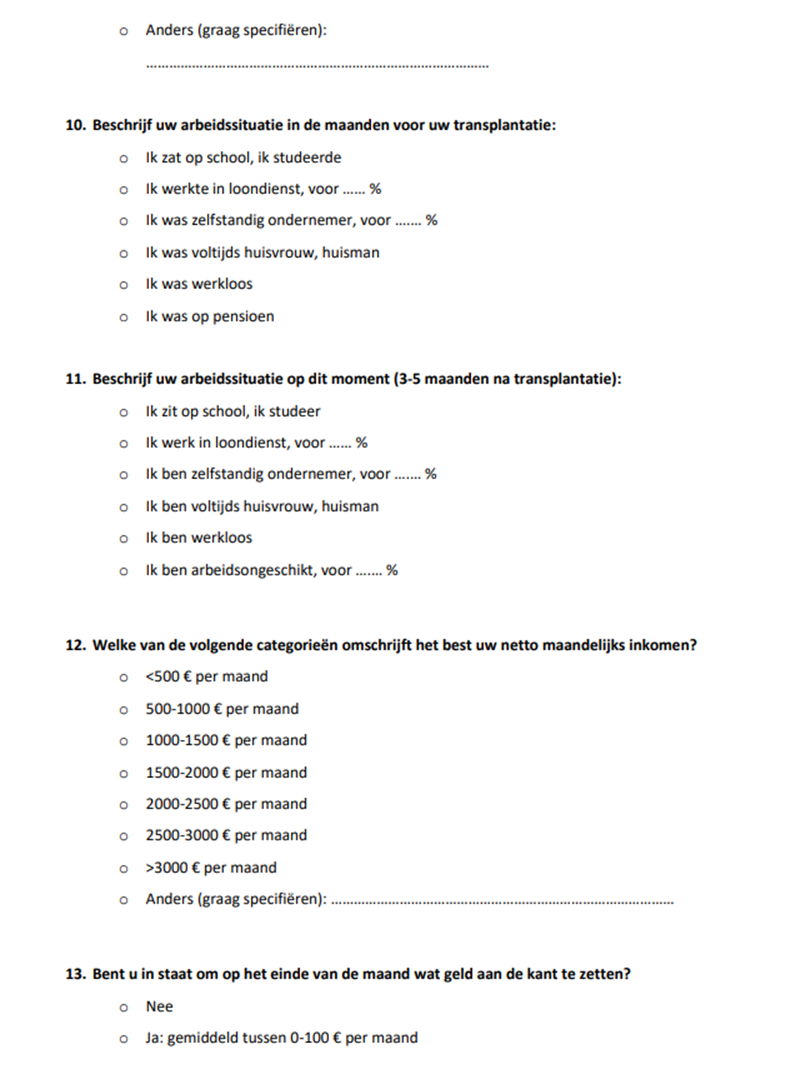

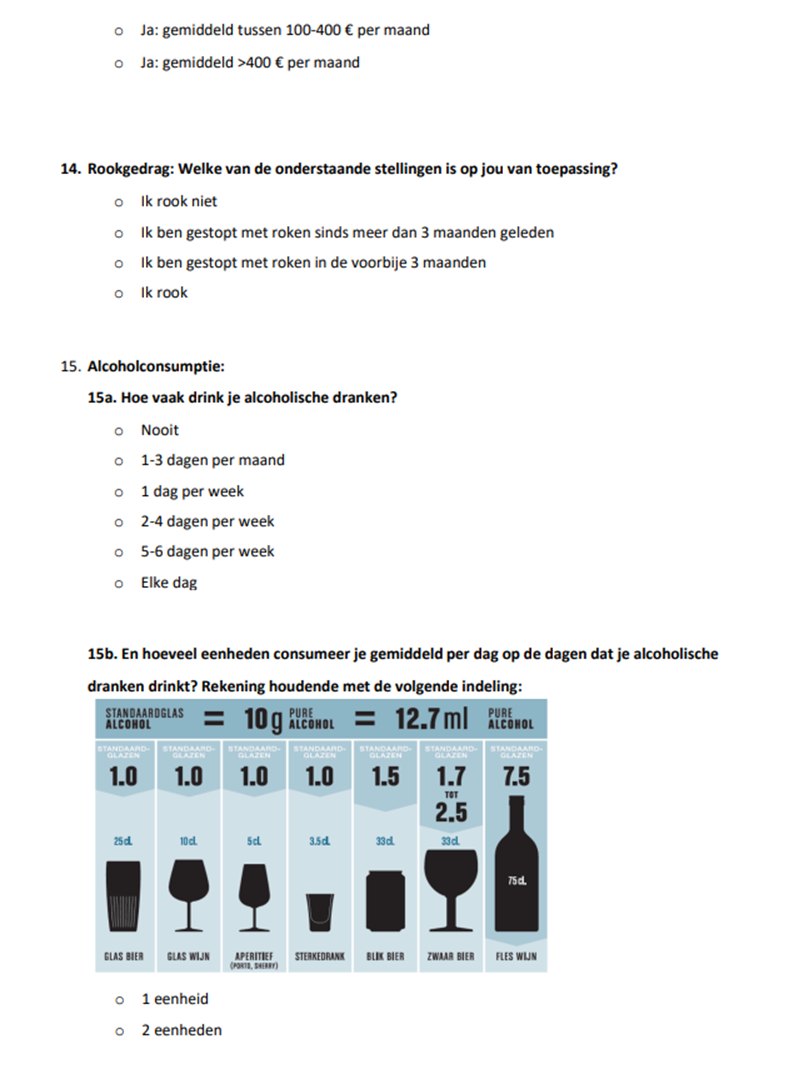

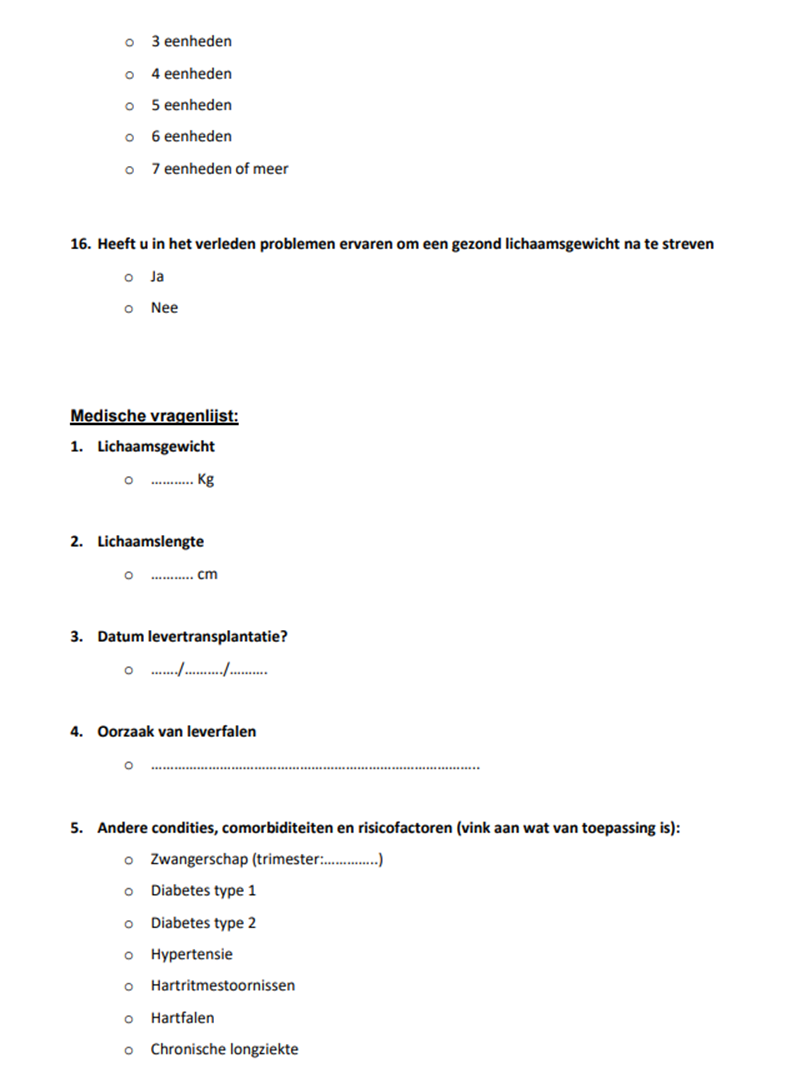

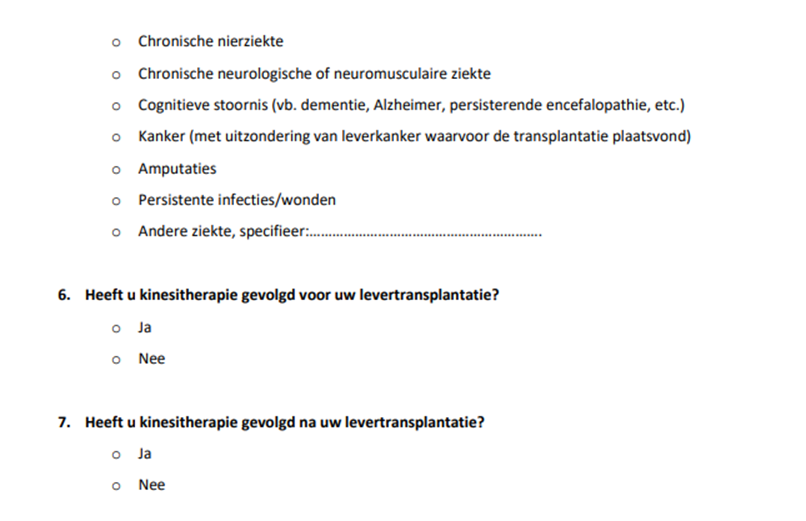


## **Supplementary Appendix II: Physical Activity Vital Sign**


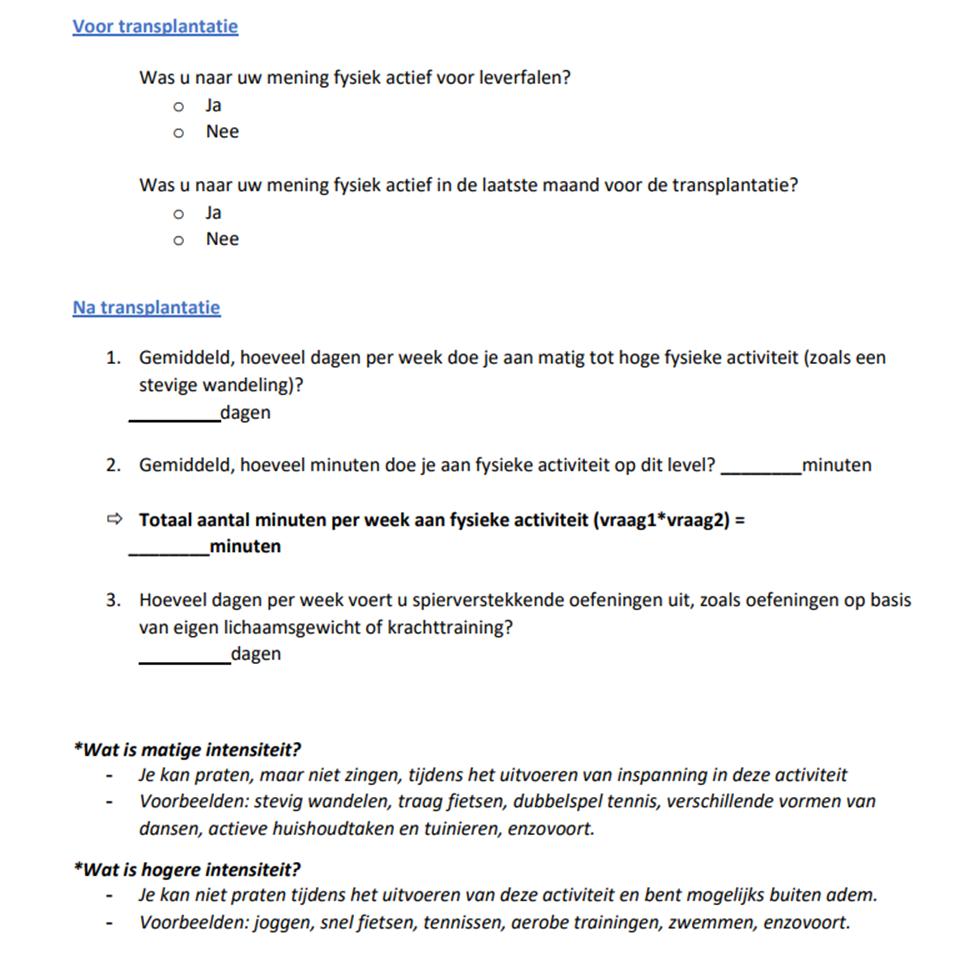


## **Supplementary Appendix III: Barriers and Motivators Questionnaire**


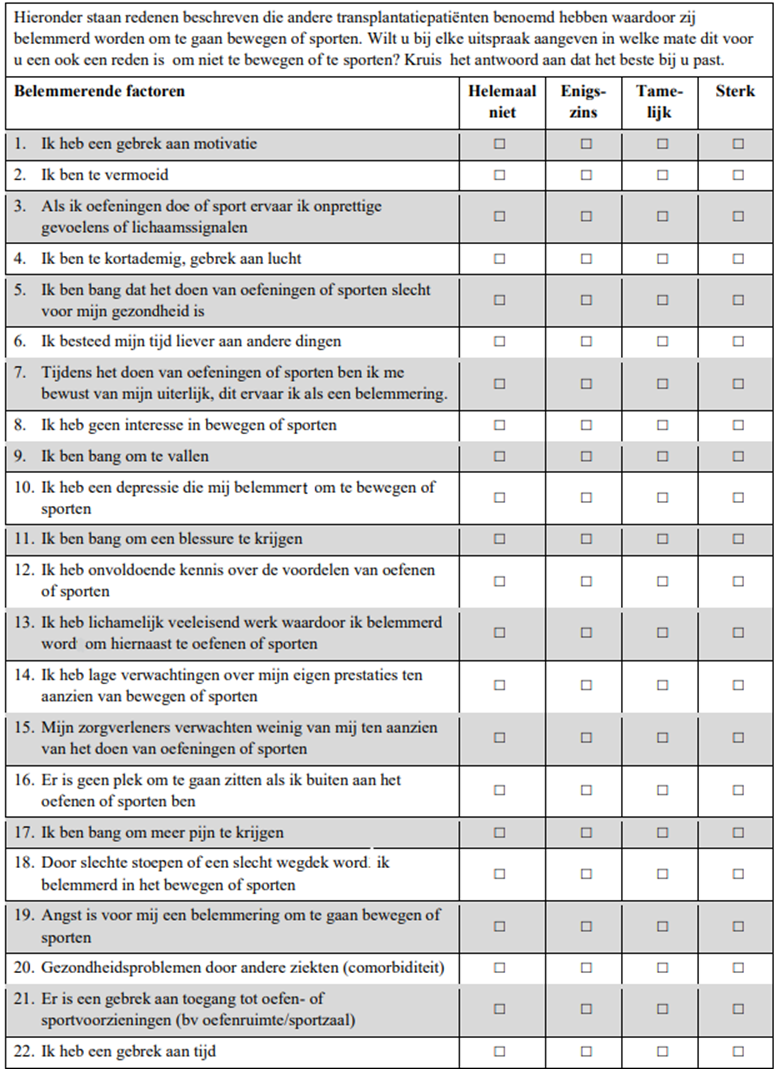


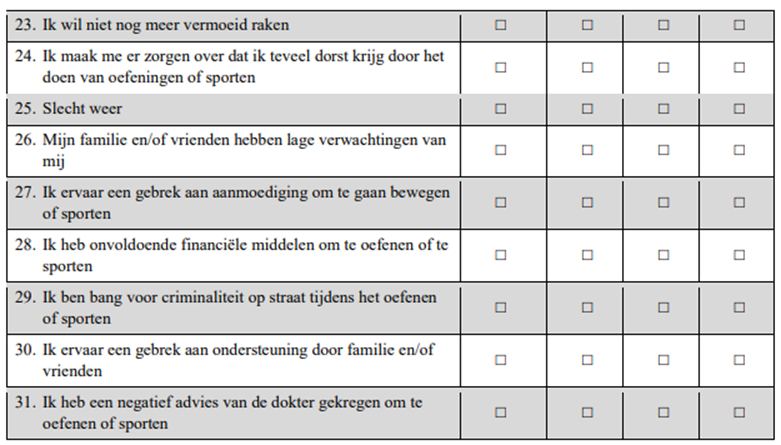


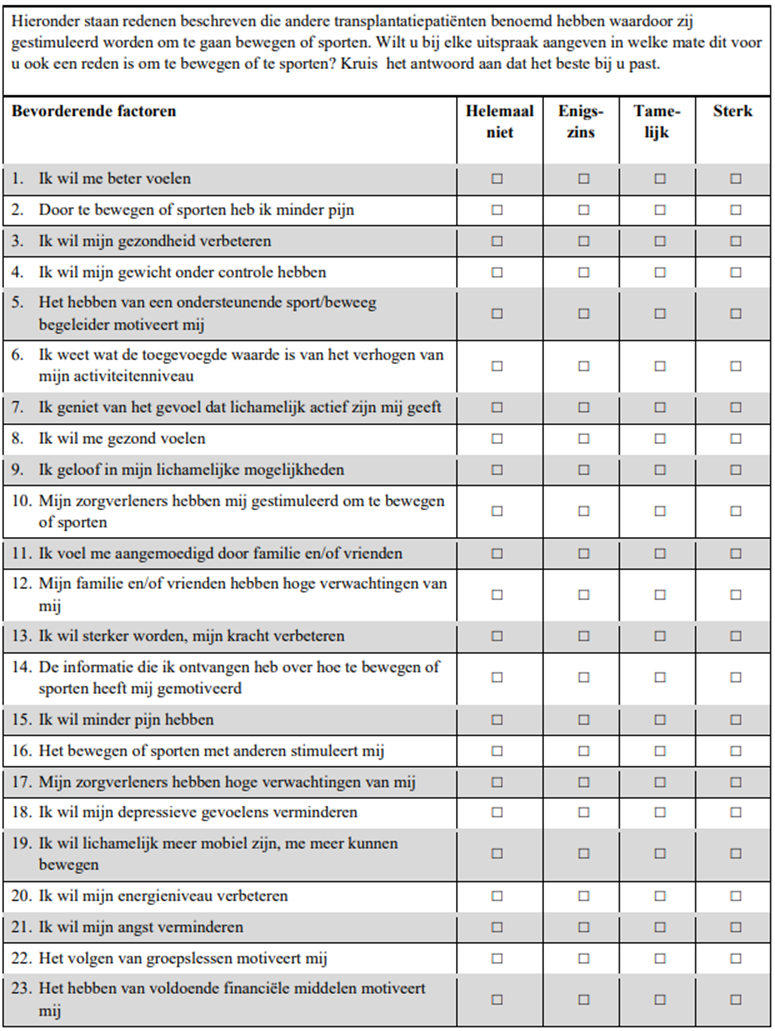


## **Supplementary Appendix IV: The main reason for unwilling to participate in the study**


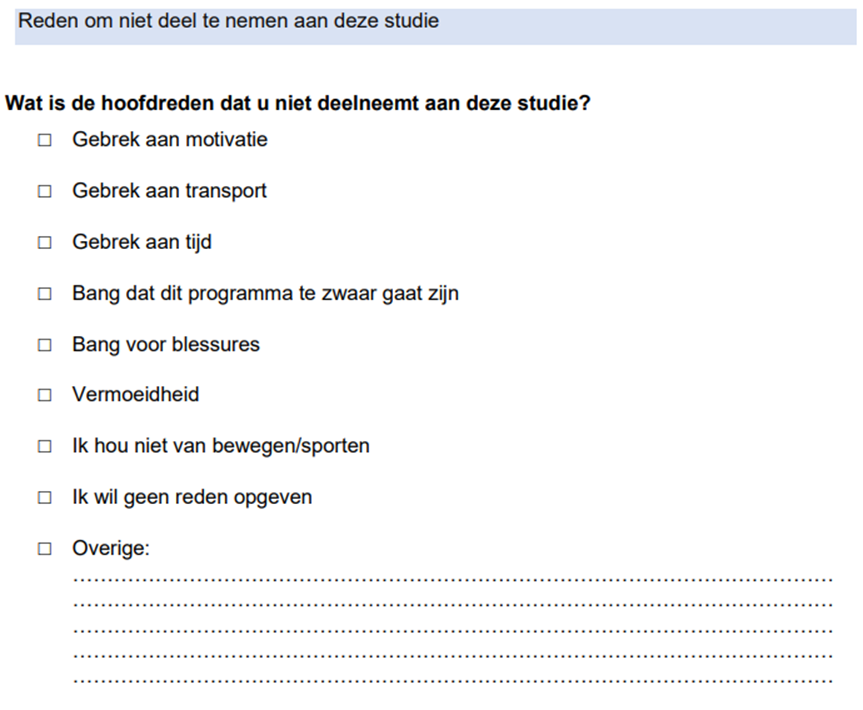


## **Supplementary Appendix V: Multiple logistic regression analysis to identify factors associated with willingness to participate in the exercise study**

|  | **Participation in the study** | |
| --- | --- | --- |
| **Variable** | **AOR [95%CI]** | **p-value** |
| Home-to-site distance (km)  Education  Motivator: Health & physical outcomes (score: 0-4 scale)  Barrier: lack of motivation or time (score: 0-4 scale) | 0.988 [0.976-1.000]  7.295 [0.777-68.500]  1.953 [0.595-6.413]  0.304 [0.084-1.108] | 0.056  0.082  0.270  0.071 |

***Abbreviations****: AOR, adjusted odd ratio; CI, confidence interval PA, physical activity; WHO, world health organization*
